# Supplementary material
Source: PubMed Central journal article supplement (PMC7910696)
Supplement: mmc2.pdf [file mmc2.pdf]

**The effect of early treatment with ivermectin on viral load, symptoms and humoral response in patients with mild COVID-19: a pilot, double-blind, placebo-controlled, randomized clinical trial.**

|                                                                                                                           |           |
|---------------------------------------------------------------------------------------------------------------------------|-----------|
| <b>Table S1. Viral loads during follow up by study arm.....</b>                                                           | <b>2</b>  |
| <b>Figure S1: Cycle threshold evolution.....</b>                                                                          | <b>3</b>  |
| <b>Figure S2: Compliance with symptoms diary.....</b>                                                                     | <b>4</b>  |
| <b>Table S2: Summary statistics of viral load profiles.....</b>                                                           | <b>5</b>  |
| <b>Figure S3: Reported fever, headache, general malaise, nasal congestion, gastrointestinal, shortness of breath.....</b> | <b>6</b>  |
| <b>Figure S4: Reports of symptoms potentially associated with ivermectin.....</b>                                         | <b>7</b>  |
| <b>Table S3. Vital signs during visits by study arm.....</b>                                                              | <b>8</b>  |
| <b>Table S4. Laboratory parameters during follow up by study arm.....</b>                                                 | <b>9</b>  |
| <b>Figure S5: Symptoms' predicted probability by study arm.....</b>                                                       | <b>10</b> |
| <b>Figure S6: Anosmia/hyposmia by sex and treatment group.....</b>                                                        | <b>11</b> |
| <b>Figure S7: Ivermectin dose per adipose weight and anosmia/hyposmia.....</b>                                            | <b>12</b> |

**Table S1. Viral loads during follow up by study arm**

|                                 | Day                                                              |                                                                 |                                   |              |              |
|---------------------------------|------------------------------------------------------------------|-----------------------------------------------------------------|-----------------------------------|--------------|--------------|
|                                 | 1                                                                | 4                                                               | 7                                 | 14           | 21           |
| <b>Viral load (gene E)</b>      |                                                                  |                                                                 |                                   |              |              |
| Ivermectin                      | 1.7·10 <sup>7</sup> (5.9·10 <sup>6</sup> - 3.9·10 <sup>8</sup> ) | 1.6·10 <sup>5</sup> (2820-8.8·10 <sup>5</sup> )                 | 1018 (92-15445)                   | 7 (0- 42)    | 1 (0- 9)     |
| Placebo                         | 2.7·10 <sup>7</sup> (8.3·10 <sup>5</sup> - 4.2·10 <sup>8</sup> ) | 4.9·10 <sup>5</sup> (1.0·10 <sup>5</sup> -9.9·10 <sup>6</sup> ) | 23550 (709-2.3·10 <sup>5</sup> )  | 30 (1- 50)   | 0 (0- 16)    |
| p-values*                       | 0.6442                                                           | 0.2482                                                          | 0.1659                            | 0.4154       | 0.4888       |
| <b>Cycle threshold (gene E)</b> |                                                                  |                                                                 |                                   |              |              |
| Ivermectin                      | 20 (17- 22)                                                      | 27 (25- 31)                                                     | 33 (30- 35)                       | 36 (35- 41)  | 38 (36- 41)  |
| Placebo                         | 21 (18- 23)                                                      | 26 (22- 28)                                                     | 30 (28- 32)                       | 35 (35- 37)  | 41 (37- 41)  |
| p-values*                       | 0.6861                                                           | 0.2040                                                          | 0.1659                            | 0.2218       | 0.2846       |
| <b>Viral load (gene N)</b>      |                                                                  |                                                                 |                                   |              |              |
| Ivermectin                      | 3.7·10 <sup>8</sup> (1.8·10 <sup>7</sup> - 9.3·10 <sup>9</sup> ) | 2.7·10 <sup>5</sup> (1885-1.0·10 <sup>6</sup> )                 | 2255 (938-34650)                  | 86 (0- 1235) | 0 (0- 67)    |
| Placebo                         | 3.3·10 <sup>8</sup> (5.8·10 <sup>7</sup> - 6.7·10 <sup>9</sup> ) | 2.2·10 <sup>6</sup> (73150-3.7·10 <sup>7</sup> )                | 36800 (4510-6.3·10 <sup>5</sup> ) | 75 (24- 710) | 107 (0- 183) |
| p-values*                       | 1.0000                                                           | 0.1842                                                          | 0.1842                            | 0.3552       | 0.0855       |
| <b>Cycle threshold (gene N)</b> |                                                                  |                                                                 |                                   |              |              |
| Ivermectin                      | 20 (16- 22)                                                      | 27 (24- 31)                                                     | 32 (30- 34)                       | 36 (33- 41)  | 41 (35- 41)  |
| Placebo                         | 21 (17- 22)                                                      | 25 (22- 27)                                                     | 29 (27- 31)                       | 35 (33- 35)  | 35 (35- 39)  |
| p-values*                       | 0.6442                                                           | 0.1333                                                          | 0.1060                            | 0.2982       | 0.2597       |

Number of subjects per day and study arm is 12. IQR: interquartile range. \*Wilcoxon rank-sum test

**Figure S1: Cycle threshold evolution**

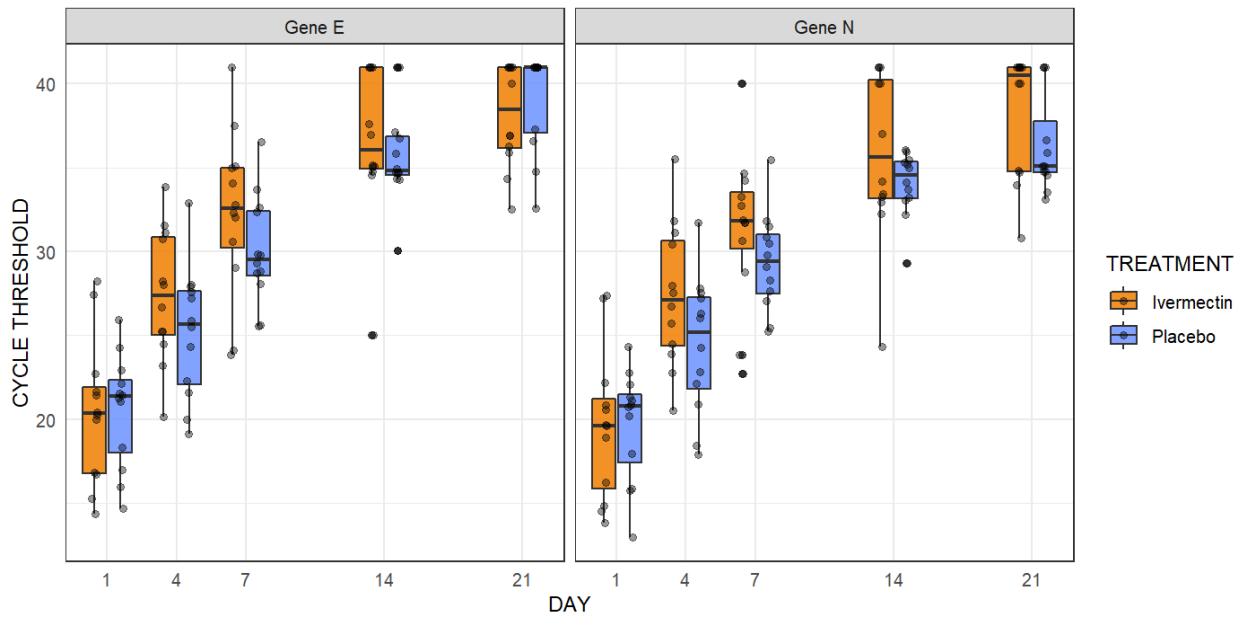

The boxes show the median and interquartile range (IQR). The whiskers extend  $\pm 1.5$  times the IQR. Dots represent each individual value.

Figure S2: Compliance with symptoms diary

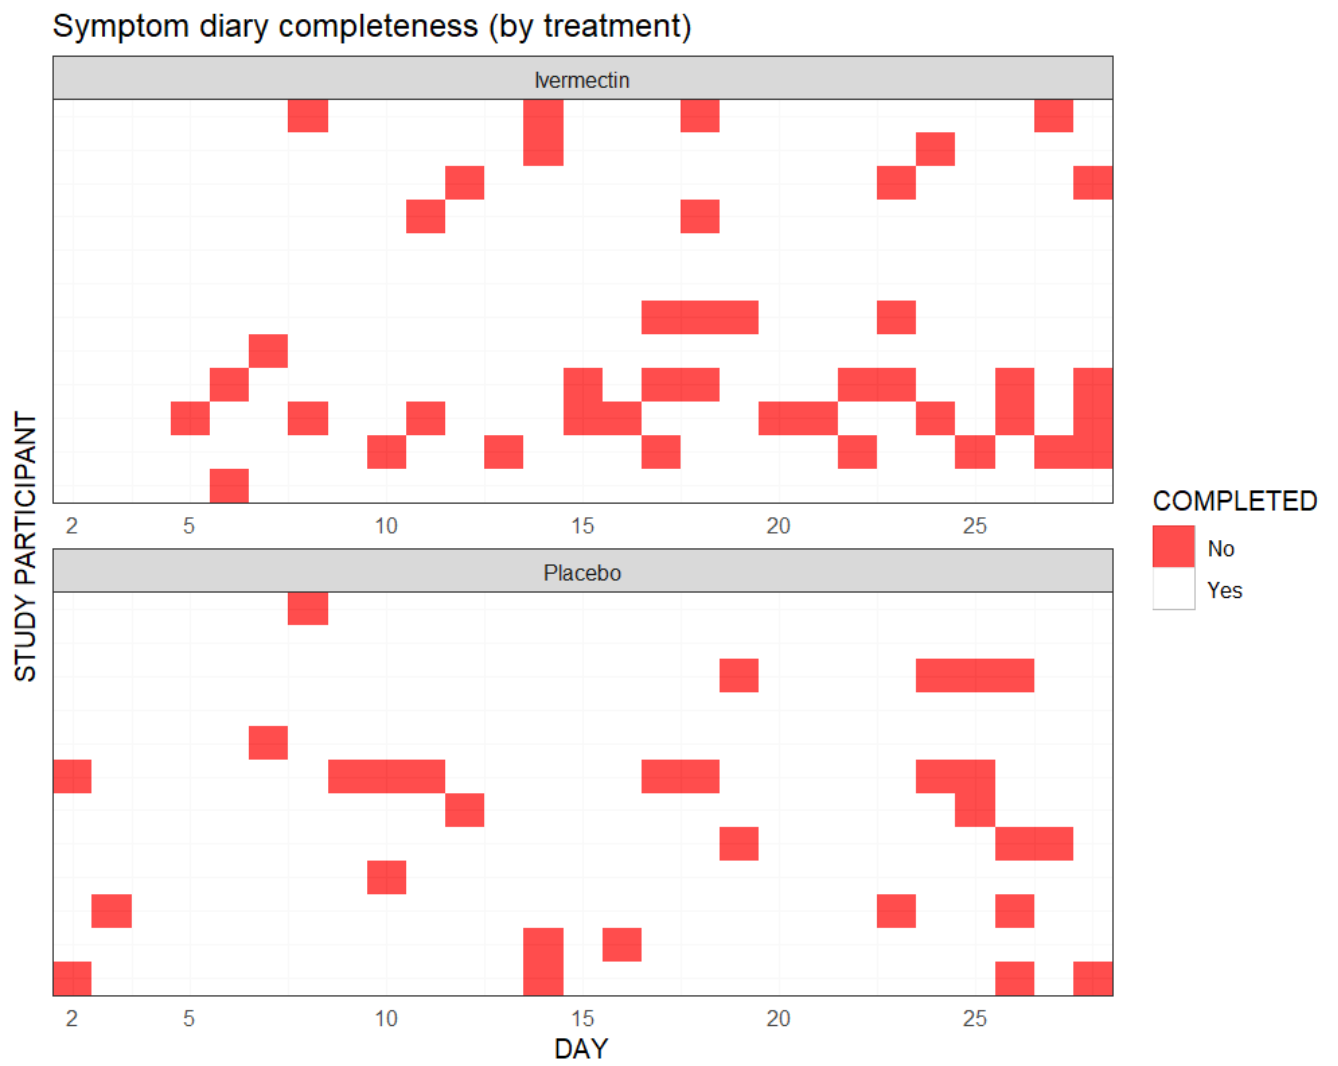

The symptoms diary had to be completed each day from days two to 28. Each row represents a study participant. Highlighted in red are those cases where the diary was not completed.

**Table S2: Summary statistics of viral load profiles**

|                                                                                                           | <b>Ivermectin</b>                                                                                                     | <b>Placebo</b>                                                                                                          | <b>p value</b> |
|-----------------------------------------------------------------------------------------------------------|-----------------------------------------------------------------------------------------------------------------------|-------------------------------------------------------------------------------------------------------------------------|----------------|
| <b>Peak viral load (Cmax), median (IQR) [range], cycles</b>                                               | 19.63 (15.87 - 21.19) [13.82 - 27.22]                                                                                 | 20.48 (17.36 - 21.14) [12.94 - 22.77]                                                                                   | 0.5846         |
| <b>Time to peak viral load (Cmax), median (IQR) [range], days</b>                                         | 6.00 (6.00 - 7.00) [5.75-10.00]                                                                                       | 7.00 (6.75 - 7.00) [6 - 11]                                                                                             | 0.2637         |
| <b>Time from start to end of positivity threshold of 35 cycles (duration), median (IQR) [range], days</b> | 18.00 (12.80 - 21.05) [11 - 27.7]                                                                                     | 20.10 (18.53 - 25.52) [11.8 - 28.9]                                                                                     | 0.1017         |
| <b>AUCobs, median (IQR) [range], cp/mL*d</b>                                                              | 3.36*10 <sup>8</sup> (3.74*10 <sup>7</sup> - 1.9*10 <sup>10</sup> )<br>[4.19*10 <sup>5</sup> -1.45*10 <sup>11</sup> ] | 8.24*10 <sup>8</sup> (2.51*10 <sup>8</sup> - 1.02*10 <sup>10</sup> )<br>[2.08*10 <sup>7</sup> - 1.70*10 <sup>12</sup> ] | 0.4764         |

IQR: interquartile range; AUCobs: area under the viral load curve. Statistical significance was assessed using a two-tailed unpaired t test with (AUCobs) or without (Cmax duration) logarithmic transformation and the Wilcoxon rank sum test (Tmax).

**Figure S3: Reported fever, headache, general malaise, nasal congestion, gastrointestinal, shortness of breath**

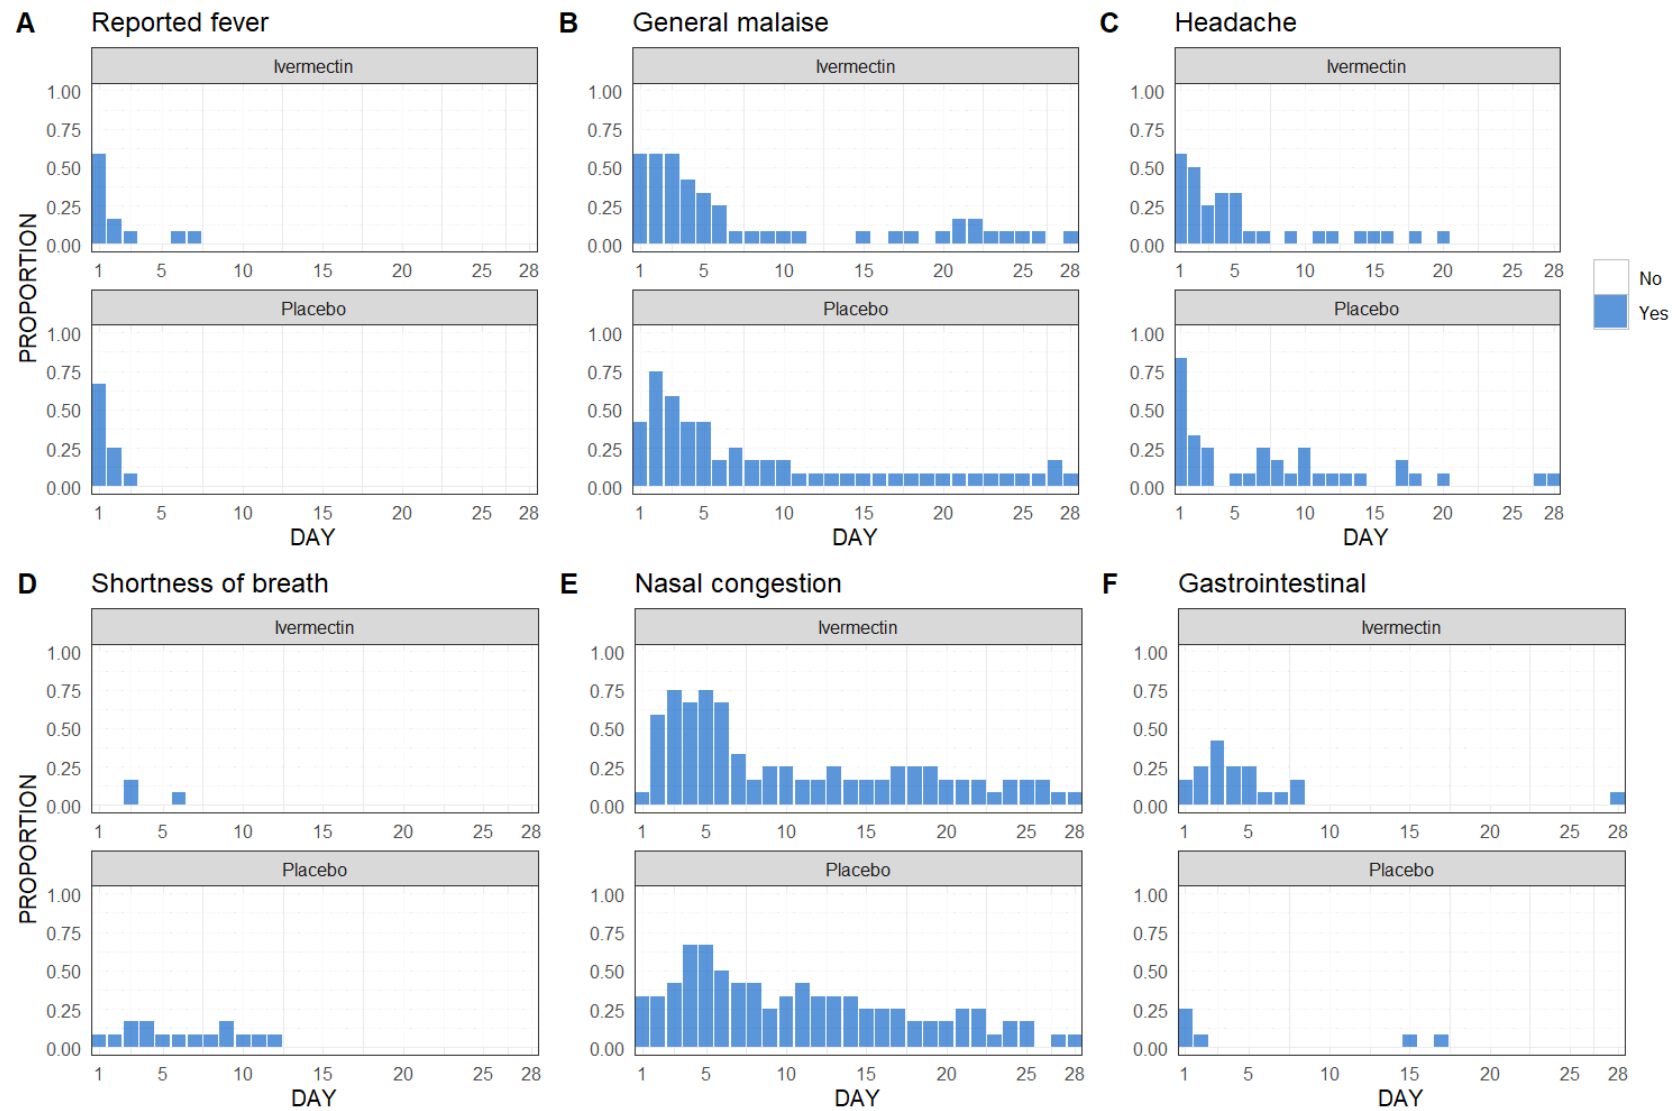

Each individual graph represents the daily proportion of individuals (n/N) who suffered from each symptom in the corresponding study arm for a 28 day follow up.

**Figure S4: Reports of symptoms potentially associated with ivermectin**

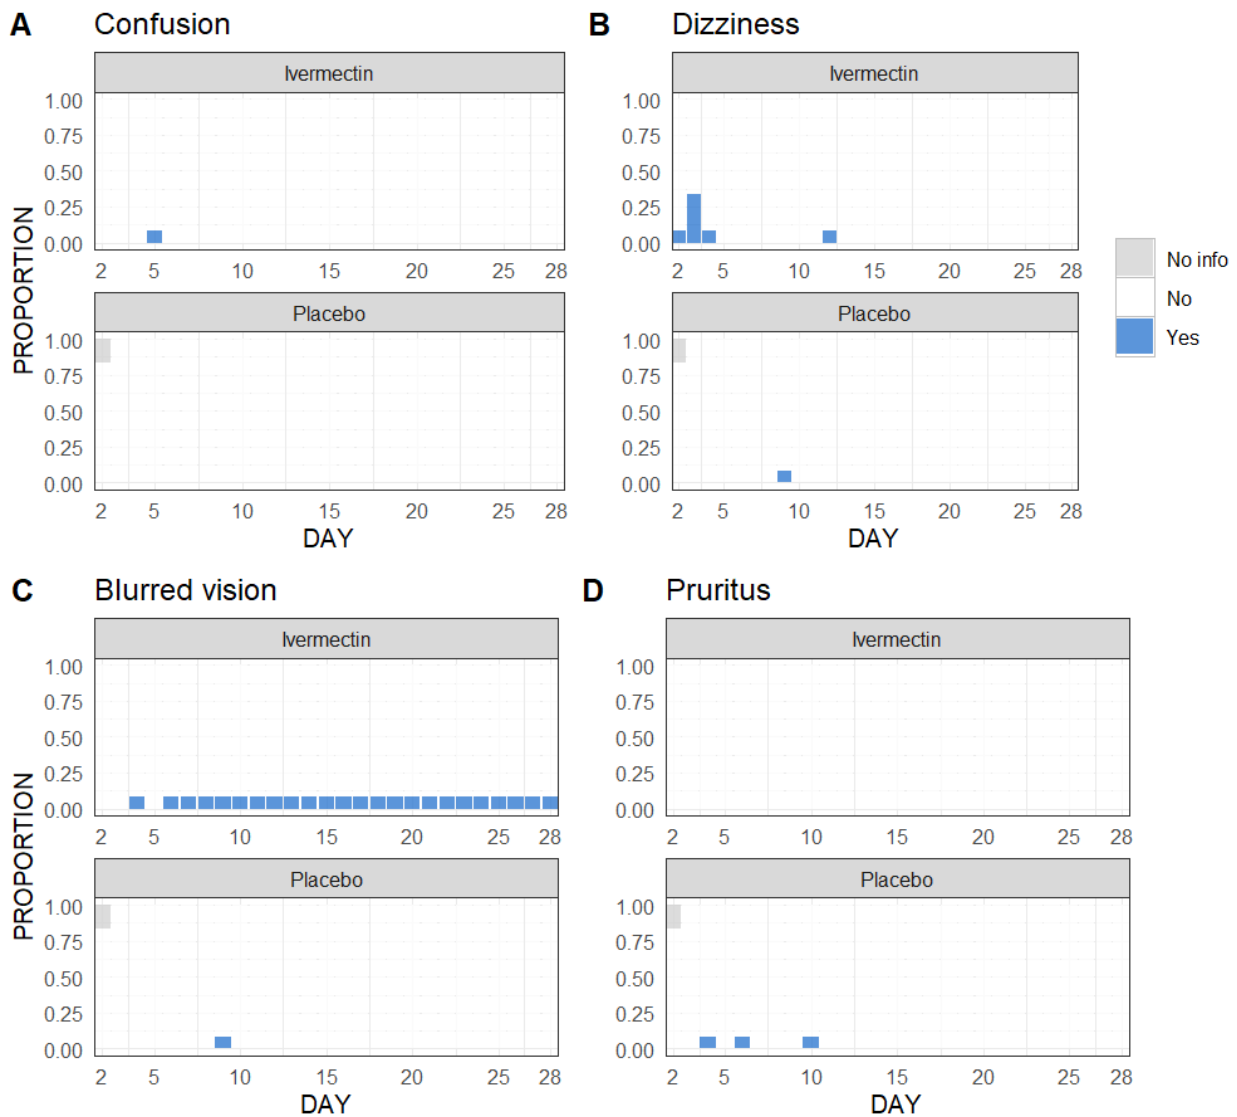

Each individual graph represents the daily proportion of individuals (n/N) who suffered from each potential side effect in the corresponding study arm for a 28 day follow up. Note that these data come from the symptom diary, which was completed from day two to day 28. Missing information was carried over from the last data available. There is some gray area on day two because there were two participants who did not complete the symptom diary on that day and no previous information existed.

**Table S3. Vital signs during visits by study arm**

|                                                           | Day              |                  |                  |                  |                  |
|-----------------------------------------------------------|------------------|------------------|------------------|------------------|------------------|
|                                                           | 1                | 7                | 14               | 21               | 28               |
| <b>Systolic blood pressure, median (IQR), mmHg</b>        |                  |                  |                  |                  |                  |
| Ivermectin                                                | 114 (113- 117)   | 108 (99- 116)    | 106 (102- 112)   | 112 (103- 122)   | 113 (108- 122)   |
| Placebo                                                   | 129 (116- 134)   | 119 (110- 123)   | 114 (108- 126)   | 114 (104- 121)   | 122 (117- 131)   |
| <b>Diastolic blood pressure, median (IQR), mmHg</b>       |                  |                  |                  |                  |                  |
| Ivermectin                                                | 76 (72- 80)      | 71 (66- 76)      | 69 (68- 72)      | 73 (70- 78)      | 75 (69- 78)      |
| Placebo                                                   | 79 (77- 85)      | 76 (72- 80)      | 73 (68- 78)      | 73 (70- 77)      | 79 (75- 85)      |
| <b>Heart rate, median (IQR), bpm</b>                      |                  |                  |                  |                  |                  |
| Ivermectin                                                | 83 (77- 99)      | 75 (68- 77)      | 74 (67- 84)      | 84 (74- 91)      | 75 (65- 87)      |
| Placebo                                                   | 90 (81- 100)     | 78 (75- 94)      | 80 (72- 89)      | 83 (74- 93)      | 92 (76- 97)      |
| <b>Respiratory rate, median (IQR), breaths per minute</b> |                  |                  |                  |                  |                  |
| Ivermectin                                                | 14 (12- 17) [11] | 12 (12- 14)      | 14 (12- 15)      | 14 (12- 14)      | 12 (12- 14)      |
| Placebo                                                   | 14 (12- 15)      | 14 (12- 14)      | 14 (13- 15)      | 12 (12- 14)      | 14 (12- 14)      |
| <b>Temperature, median (IQR), °C</b>                      |                  |                  |                  |                  |                  |
| Ivermectin                                                | 36.8 (36.4-37.0) | 36.4 (36.0-36.5) | 36.4 (36.0-36.7) | 36.5 (36.0-36.6) | 36.5 (36.4-36.6) |
| Placebo                                                   | 36.9 (36.5-37.0) | 36.5 (36.2-36.7) | 36.5 (36.3-36.6) | 36.4 (36.2-36.8) | 36.5 (36.1-36.9) |
| <b>Oxygen saturation, median (IQR), %</b>                 |                  |                  |                  |                  |                  |
| Ivermectin                                                | 97 (96- 98)      | 97 (96- 99)      | 97 (96- 97)      | 96 (96- 98)      | 97 (96- 98)      |
| Placebo                                                   | 98 (97- 100)     | 98 (97- 98)      | 98 (97- 98)      | 97 (96- 98)      | 97 (96- 98)      |

Number of subjects per day and study arm is 12, otherwise indicated in brackets.

IQR: interquartile range; bpm: beats per minute.



**Table S4. Laboratory parameters during follow up by study arm**

| Variable                                     | Day                 |                       |                          | Normal range |
|----------------------------------------------|---------------------|-----------------------|--------------------------|--------------|
|                                              | 1                   | 7                     | 14                       |              |
| <b>Blood creatinine, median (IQR), mg/dL</b> |                     |                       |                          |              |
| Ivermectin                                   | 0.9 (0.8- 1.1)      | 0.8 (0.8- 0.9)        | 0.8 (0.8- 1.0)           | 0.7-1.2      |
| Placebo                                      | 0.9 (0.6- 1.1)      | 0.8 (0.7- 1.0)        | 0.8 (0.7- 1.0) [11]      |              |
| <b>Urea blood, median (IQR), mg/dL</b>       |                     |                       |                          |              |
| Ivermectin                                   | 28 (22- 34)         | 29 (27- 36)           | 30 (26- 35)              | 16.6-48.5    |
| Placebo                                      | 27 (26- 35)         | 33 (27- 41)           | 30 (27- 38) [11]         |              |
| <b>LDH, median (IQR), U/L</b>                |                     |                       |                          |              |
| Ivermectin                                   | 231 (192- 251) [11] | 223 (202- 264)        | 235 (217- 250)           | 135-225      |
| Placebo                                      | 217 (207- 255)      | 217 (191- 227)        | 224 (204- 232) [11]      |              |
| <b>CRP, median (IQR), mg/dL</b>              |                     |                       |                          |              |
| Ivermectin                                   | 0.35 (0.16-0.81)    | 0.10 (0.03-0.16)      | 0.08 (0.06-0.10)         | <0.5         |
| Placebo                                      | 0.30 (0.19-0.60)    | 0.11 (0.06-0.21)      | 0.06 (0.04-0.12) [11]    |              |
| <b>Procalcitonin, median (IQR), ng/mL</b>    |                     |                       |                          |              |
| Ivermectin                                   | 0.07 (0.04-0.10)    | 0.03 (0.02-0.03)      | 0.03 (0.02-0.03)         | <0.5         |
| Placebo                                      | 0.05 (0.04-0.06)    | 0.03 (0.02-0.03)      | 0.02 (0.02-0.04) [11]    |              |
| <b>Sodium, median (IQR), mEq/L</b>           |                     |                       |                          |              |
| Ivermectin                                   | 139 (136- 142)      | 141 (140- 142)        | 141 (140- 141)           | 136-145      |
| Placebo                                      | 139 (139- 141)      | 141 (140- 141)        | 141 (139- 143) [11]      |              |
| <b>Potassium, median (IQR), mEq/L</b>        |                     |                       |                          |              |
| Ivermectin                                   | 4.1 (3.8- 4.1)      | 3.9 (3.8- 4.0)        | 4.0 (4.0- 4.1)           | 3.5-5.0      |
| Placebo                                      | 4.1 (3.9- 4.3)      | 4.0 (3.8- 4.3)        | 3.9 (3.8- 4.2) [11]      |              |
| <b>Chlorine, median (IQR), mEq/L</b>         |                     |                       |                          |              |
| Ivermectin                                   | 97 (95- 100)        | 100 (98- 102)         | 99 (98- 102)             | 98-107       |
| Placebo                                      | 99 (98- 101)        | 100 (99- 101)         | 101 (98- 103) [11]       |              |
| <b>Bicarbonate, median (IQR), mEq/L</b>      |                     |                       |                          |              |
| Ivermectin                                   | 24.2 (22.6-26.1)    | 24.8 (23.6-26.1) [11] | 24.3 (22.6-25.4)         | 22-29        |
| Placebo                                      | 24.5 (22.4-26.1)    | 24.9 (23.0-26.4)      | 24.5 (22.2-26.1) [11]    |              |
| <b>Remaining anion, median (IQR), mEq/L</b>  |                     |                       |                          |              |
| Ivermectin                                   | 16.7 (15.2-19.3)    | 15.1 (14.7-19.8) [11] | 15.8 (15.1-17.5)         | 8-16         |
| Placebo                                      | 16.6 (12.7-18.1)    | 15.4 (14.7-17.4)      | 16.5 (13.5-19.2) [11]    |              |
| <b>Ferritin, median (IQR), ng/mL</b>         |                     |                       |                          |              |
| Ivermectin                                   | 165.0 (95.8-241.3)  | 125.0 (79.5-343.4)    | 152.0 (69.4-305.3)       | 30-400       |
| Placebo                                      | 156.1 (103.1-223.0) | 198.7 (109.5-248.2)   | 145.2 (132.4-196.1) [11] |              |
| <b>CPK, median (IQR), U/L</b>                |                     |                       |                          |              |
| Ivermectin                                   | 98 (79- 131)        | 64 (47- 100)          | 106 (63- 160)            | <190         |
| Placebo                                      | 66 (59- 113)        | 47 (41- 76)           | 55 (52- 114) [11]        |              |
| <b>IL-6, median (IQR), pg/mL</b>             |                     |                       |                          |              |
| Ivermectin                                   | 6.5 (5.1- 9.6)      | 4.3 (3.8- 5.2) [11]   | 2.7 (1.5- 4.4)           | <7           |
| Placebo                                      | 4.5 (3.0- 6.5) [11] | 4.2 (3.5- 4.9) [11]   | 2.1 (1.5- 4.7) [11]      |              |
| <b>D-Dimer, median (IQR), ng/mL</b>          |                     |                       |                          |              |
| Ivermectin                                   | 295 (270- 420)      | 295 (270- 435)        | 270 (270- 340)           | 150-500      |
| Placebo                                      | 280 (270- 315)      | 270 (270- 310)        | 270 (270- 330) [11]      |              |

Number of subjects per day and study arm is 12, otherwise indicated in brackets.

IQR: interquartile range.

Figure S5: Symptoms' predicted probability by study arm.

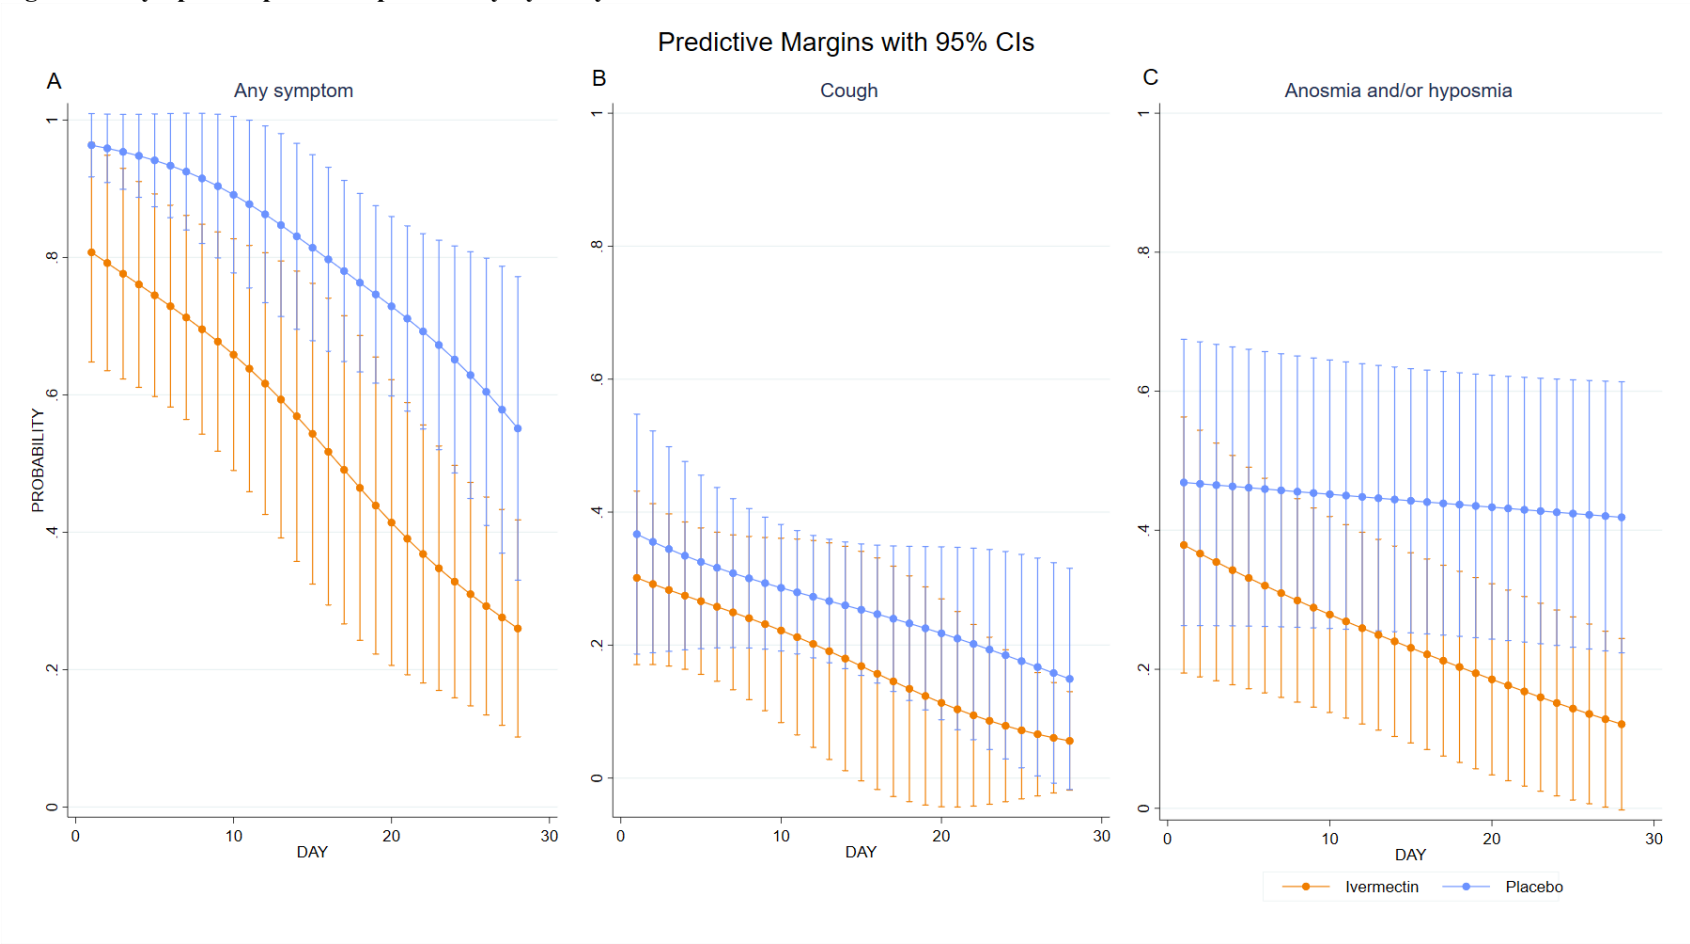

For each symptom, the graph shows the evolution by study arm of its probability during follow up. It was estimated based on mixed effects logistic regression models with subject as a random intercept. These models were adjusted by day of follow up (as symptoms are expected to disappear over time), duration of symptoms before enrolment (as a proxy of disease onset) and the interaction between study arm and day of follow up.

**Figure S6: Anosmia/hyposmia by sex and treatment group**

Symptom prevalence (by treatment and gender) - Anosmia and/or hyposmia

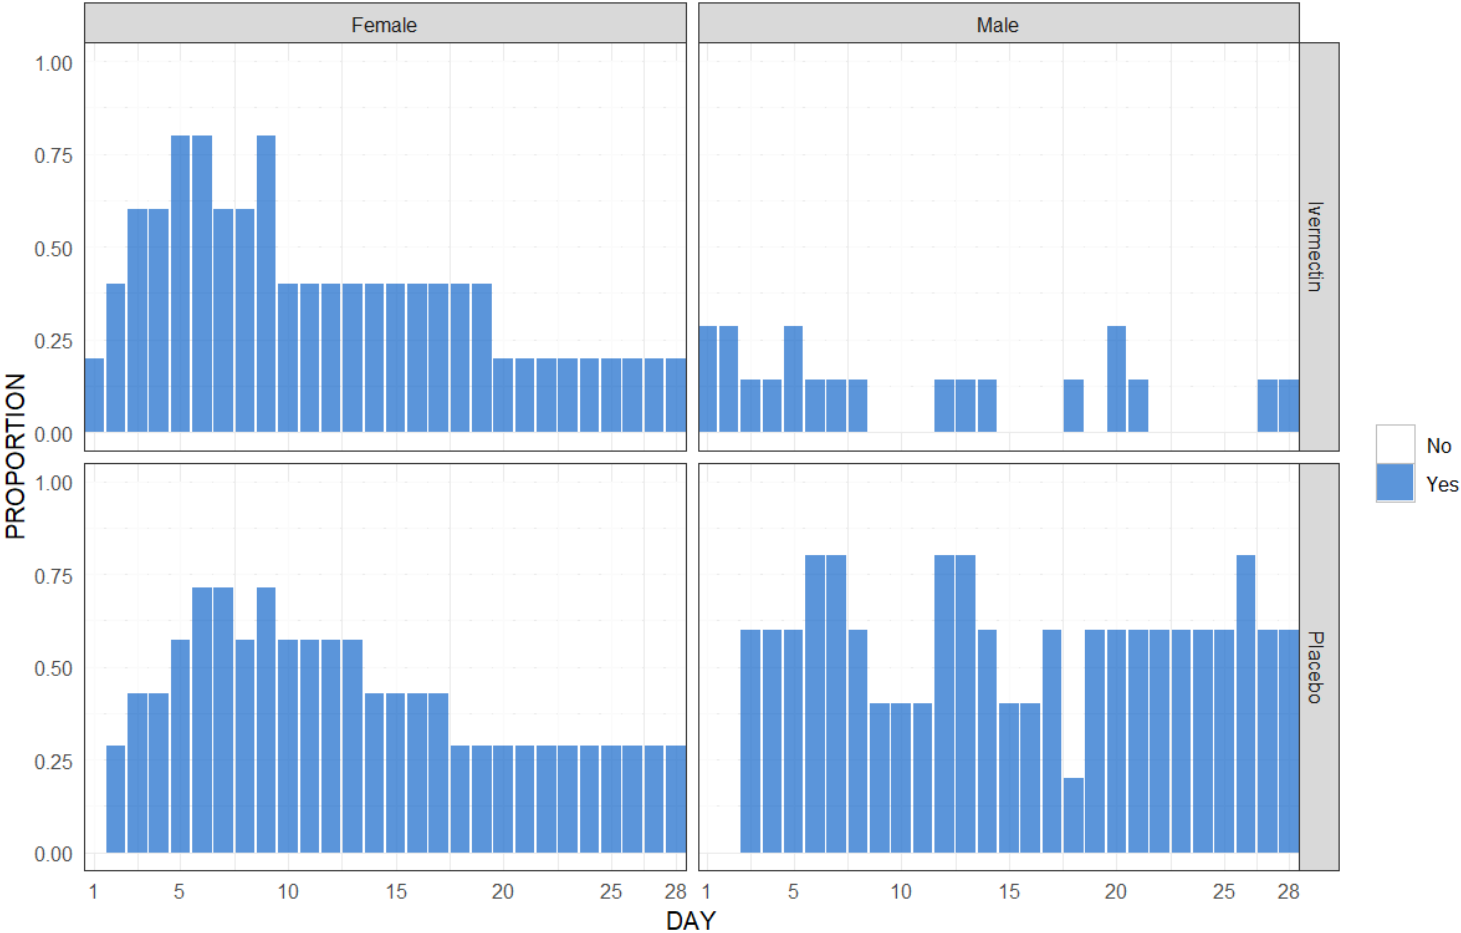

Each individual graph represents the daily proportion of individuals (n/N) who suffered from anosmia/hyposmia in the corresponding study arm for a 28 day follow up.

Figure S7: Ivermectin dose per adipose weight and anosmia/hyposmia

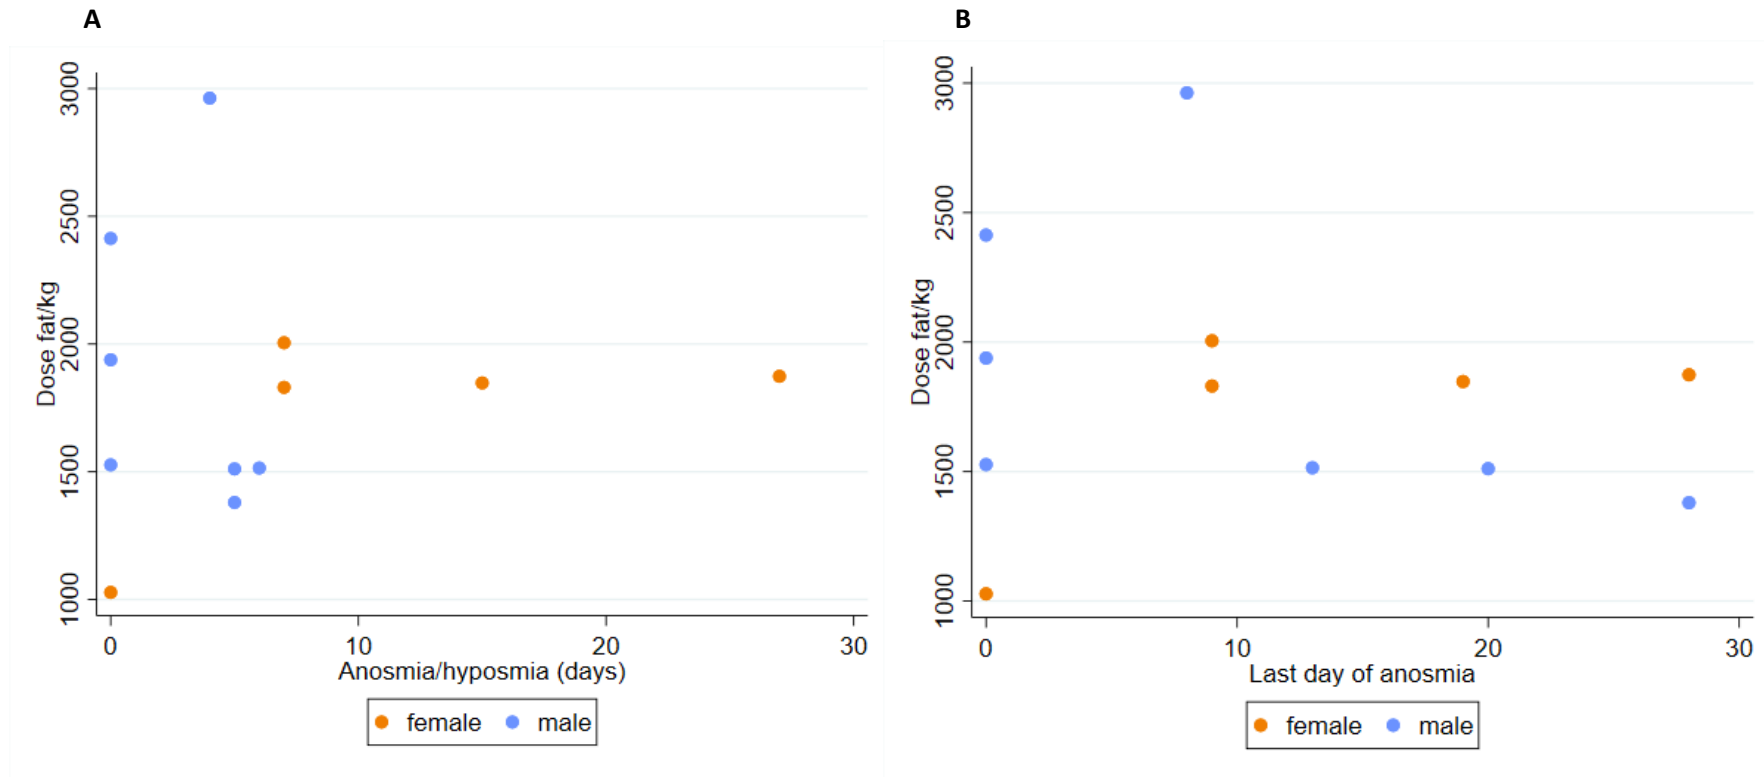

Panel A: duration of anosmia/hyposmia in days, Panel B: last day of reported anosmia
